# Supplementary material
Source: PubMed Central journal article supplement (PMC9559688)
Supplement: MP-45-2925-s001.pdf [file MP-45-2925-s001.pdf]

Patient 1

|     | Imaging Plane | Power[W] | Duration [s] | Measured Energy [J] | Peak Temperature [C] | Average Temperature [C] |
|-----|---------------|----------|--------------|---------------------|----------------------|-------------------------|
| 1   | Axial         | 150      | 10           | 1500                | 48.81                | 47.45                   |
| 2   | Axial         | 120      | 10           | 1200                | 46.75                | 44.64                   |
| 3   | Sagittal      | 100      | 10           | 1000                | 42.75                | 41.92                   |
| 4   | Coronal       | 100      | 10           | 1000                | 44.88                | 43.54                   |
| 5   | Coronal       | 150      | 10           | 1500                | 46.57                | 44.99                   |
| 6   | Axial         | 200      | 10           | 2000                | 49.94                | 47.37                   |
| 7*  | Axial         | 230      | 10           | 2300                | 53.97                | 50.51                   |
| 8   | Sagittal      | 250      | 10           | 2500                | 53.77                | 50.17                   |
| 9   | Coronal       | 280      | 10           | 2800                | 53.24                | 51.69                   |
| 10  | Axial         | 320      | 10           | 3200                | 55.80                | 52.74                   |
| 11  | Axial         | 320      | 13           | 4160                | 63.68                | 57.84                   |
| 12  | Coronal       | 320      | 13           | 4160                | 54.02                | 51.96                   |
| 13* | Axial         | 351      | 13           | 4563                | 58.20                | 54.84                   |

Patient 2

|    |          |     |    |       |       |       |
|----|----------|-----|----|-------|-------|-------|
| 1  | Axial    | 200 | 10 | 2000  | 40.48 | 39.93 |
| 2  | Axial    | 250 | 10 | 2500  | 41.34 | 41.30 |
| 3  | Axial    | 300 | 10 | 3000  | 46.64 | 43.91 |
| 4  | Coronal  | 350 | 10 | 3500  | 46.86 | 45.07 |
| 5  | Coronal  | 350 | 10 | 3500  | 45.16 | 44.57 |
| 6  | Sagittal | 350 | 10 | 3500  | 47.25 | 45.69 |
| 7  | Axial    | 450 | 10 | 4500  | 47.30 | 46.47 |
| 8  | Axial    | 499 | 10 | 4995  | 50.29 | 47.27 |
| 9  | Coronal  | 648 | 10 | 6480  | 50.59 | 48.03 |
| 10 | Axial    | 649 | 13 | 8437  | 54.94 | 51.96 |
| 11 | Axial    | 748 | 13 | 9724  | 56.72 | 52.52 |
| 12 | Coronal  | 748 | 17 | 12716 | 56.57 | 53.72 |
| 13 | Axial    | 700 | 20 | 14000 | 58.30 | 54.91 |
| 14 | Axial    | 700 | 24 | 16800 | 56.89 | 53.28 |
| 15 | Axial    | 798 | 24 | 19152 | 58.30 | 56.62 |

Patient 3

|    |          |     |    |       |       |       |
|----|----------|-----|----|-------|-------|-------|
| 1  | Axial    | 199 | 10 | 1995  | 45.04 | 43.54 |
| 2  | Axial    | 199 | 10 | 1995  | 48.15 | 45.22 |
| 3  | Coronal  | 199 | 10 | 1995  | 47.09 | 44.72 |
| 4  | Axial    | 300 | 10 | 3000  | 45.83 | 46.59 |
| 5  | Axial    | 300 | 10 | 3000  | 49.46 | 46.73 |
| 6  | Axial    | 300 | 10 | 3000  | 49.90 | 47.36 |
| 7  | Sagittal | 300 | 10 | 3000  | 49.76 | 46.98 |
| 8  | Axial    | 450 | 10 | 4500  | 53.93 | 51.34 |
| 9  | Axial    | 500 | 10 | 4995  | 53.62 | 49.66 |
| 10 | Coronal  | 500 | 13 | 6494  | 50.42 | 50.94 |
| 11 | Axial    | 550 | 17 | 9350  | 55.57 | 54.77 |
| 12 | Coronal  | 600 | 20 | 11990 | 58.93 | 55.08 |

|     |       |     |    |       |       |       |
|-----|-------|-----|----|-------|-------|-------|
| 13* | Axial | 600 | 24 | 14388 | 53.06 | 52.82 |
|-----|-------|-----|----|-------|-------|-------|

Patient 4

|     |          |     |    |       |       |       |
|-----|----------|-----|----|-------|-------|-------|
| 1   | Axial    | 200 | 10 | 2000  | 42.60 | 42.10 |
| 2   | Axial    | 250 | 10 | 2500  | 43.80 | 43.48 |
| 3   | Coronal  | 250 | 10 | 2500  | 42.77 | 41.46 |
| 4   | Axial    | 352 | 10 | 3520  | 47.68 | 43.84 |
| 5   | Axial    | 404 | 10 | 4040  | 45.00 | 44.70 |
| 6   | Sagittal | 508 | 10 | 5080  | 49.76 | 46.61 |
| 7   | Sagittal | 508 | 10 | 5080  | 46.94 | 46.59 |
| 8   | Axial    | 550 | 17 | 9350  | 53.51 | 51.67 |
| 9   | Axial    | 600 | 17 | 10192 | 51.95 | 50.58 |
| 10  | Coronal  | 600 | 20 | 11990 | 49.95 | 49.82 |
| 11  | Coronal  | 595 | 20 | 11900 | 51.94 | 49.76 |
| 12  | Axial    | 697 | 20 | 13940 | 55.17 | 52.82 |
| 13  | Axial    | 799 | 20 | 15980 | 53.91 | 52.23 |
| 14  | Axial    | 799 | 24 | 19176 | 58.29 | 55.24 |
| 15* | Axial    | 799 | 24 | 19176 | 59.07 | 55.86 |
| 16* | Coronal  | 799 | 24 | 19176 | 55.87 | 53.64 |

Patient 5

|    |          |     |    |      |       |       |
|----|----------|-----|----|------|-------|-------|
| 1  | Axial    | 150 | 10 | 1500 | 47.50 | 44.97 |
| 2  | Axial    | 150 | 10 | 1500 | 47.34 | 45.29 |
| 3  | Sagittal | 150 | 10 | 1500 | 45.72 | 44.69 |
| 4  | Axial    | 200 | 10 | 2000 | 49.30 | 47.40 |
| 5  | Axial    | 200 | 10 | 2000 | 49.20 | 47.21 |
| 6  | Coronal  | 200 | 10 | 2000 | 46.22 | 44.90 |
| 7  | Axial    | 350 | 10 | 3500 | 54.73 | 52.26 |
| 8  | Axial    | 350 | 17 | 5950 | 60.51 | 55.74 |
| 9  | Axial    | 350 | 20 | 7000 | 59.21 | 55.31 |
| 10 | Axial    | 350 | 24 | 8400 | 58.25 | 54.85 |

Patient 6

|   |          |     |    |       |       |       |
|---|----------|-----|----|-------|-------|-------|
| 1 | Axial    | 200 | 10 | 2000  | 42.62 | 41.55 |
| 2 | Axial    | 300 | 10 | 3000  | 45.79 | 43.67 |
| 3 | Coronal  | 400 | 10 | 4000  | 45.43 | 44.67 |
| 4 | Axial    | 599 | 10 | 5995  | 47.92 | 46.72 |
| 5 | Axial    | 698 | 10 | 6985  | 51.75 | 48.42 |
| 6 | Sagittal | 748 | 10 | 7480  | 51.42 | 47.83 |
| 7 | Axial    | 749 | 17 | 12733 | 54.03 | 51.02 |
| 8 | Axial    | 850 | 20 | 17000 | 54.50 | 53.08 |
| 9 | Axial    | 901 | 27 | 24327 | 58.37 | 54.14 |

Patient 7

|   |         |     |    |      |       |       |
|---|---------|-----|----|------|-------|-------|
| 1 | Axial   | 200 | 10 | 2000 | 49.32 | 45.78 |
| 2 | Axial   | 200 | 10 | 2000 | 48.41 | 45.47 |
| 3 | Coronal | 200 | 10 | 2000 | 46.92 | 45.39 |

|    |         |     |    |       |       |       |
|----|---------|-----|----|-------|-------|-------|
| 4  | Axial   | 250 | 10 | 2500  | 51.49 | 48.17 |
| 5  | Axial   | 250 | 10 | 2500  | 46.96 | 45.39 |
| 6  | Coronal | 250 | 10 | 2500  | 48.73 | 46.86 |
| 7  | Axial   | 400 | 10 | 4000  | 55.29 | 50.84 |
| 8  | Axial   | 504 | 10 | 5040  | 57.86 | 52.24 |
| 9  | Coronal | 564 | 10 | 5640  | 53.38 | 51.37 |
| 10 | Axial   | 550 | 17 | 9350  | 60.87 | 57.08 |
| 11 | Axial   | 550 | 20 | 11000 | 62.67 | 57.48 |

Patient 8

|    |          |     |    |       |       |       |
|----|----------|-----|----|-------|-------|-------|
| 1  | Axial    | 150 | 10 | 1500  | 45.41 | 43.67 |
| 2  | Axial    | 150 | 10 | 1500  | 42.94 | 43.17 |
| 3  | Coronal  | 199 | 10 | 1995  | 46.06 | 45.61 |
| 4  | Axial    | 250 | 10 | 2500  | 50.10 | 46.31 |
| 5  | Axial    | 300 | 10 | 3000  | 50.75 | 48.28 |
| 6  | Sagittal | 351 | 10 | 3510  | 50.41 | 48.57 |
| 7  | Axial    | 499 | 10 | 4995  | 56.49 | 53.23 |
| 8  | Axial    | 501 | 13 | 6507  | 54.48 | 53.69 |
| 9  | Axial    | 500 | 13 | 6506  | 57.45 | 54.28 |
| 10 | Axial    | 500 | 17 | 8508  | 57.57 | 54.94 |
| 11 | Axial    | 598 | 17 | 10166 | 57.50 | 54.87 |
| 12 | Axial    | 598 | 24 | 14352 | 56.91 | 54.75 |

Patient 9

|    |          |     |    |       |       |       |
|----|----------|-----|----|-------|-------|-------|
| 1  | Axial    | 150 | 10 | 1500  | 45.07 | 43.53 |
| 2  | Axial    | 150 | 10 | 1500  | 43.16 | 41.79 |
| 3  | Coronal  | 199 | 10 | 1995  | 43.30 | 44.14 |
| 4  | Coronal  | 200 | 10 | 1995  | 47.03 | 44.84 |
| 5  | Axial    | 300 | 10 | 3000  | 47.26 | 45.47 |
| 6  | Axial    | 351 | 10 | 3510  | 51.85 | 48.63 |
| 7  | Sagittal | 351 | 10 | 3510  | 48.39 | 45.92 |
| 8  | Sagittal | 351 | 10 | 3510  | 50.44 | 46.23 |
| 9  | Axial    | 352 | 10 | 3520  | 49.28 | 44.84 |
| 10 | Axial    | 550 | 10 | 5500  | 51.50 | 47.87 |
| 11 | Coronal  | 649 | 13 | 8437  | 56.00 | 53.61 |
| 12 | Axial    | 699 | 17 | 11875 | 57.03 | 54.29 |
| 13 | Axial    | 699 | 24 | 16764 | 59.76 | 57.51 |

Patient 10

|    |          |     |    |       |       |       |
|----|----------|-----|----|-------|-------|-------|
| 1  | Axial    | 200 | 10 | 2000  | 47.28 | 44.37 |
| 2  | Axial    | 200 | 10 | 2000  | 44.65 | 43.40 |
| 3  | Coronal  | 200 | 10 | 2000  | 42.09 | 41.50 |
| 4* | Axial    | 400 | 10 | 4000  | 51.29 | 47.72 |
| 5  | Axial    | 400 | 10 | 4000  | 49.32 | 45.94 |
| 6  | Sagittal | 400 | 10 | 4000  | 49.49 | 47.46 |
| 7  | Axial    | 600 | 13 | 7800  | 53.63 | 50.05 |
| 8  | Axial    | 450 | 20 | 9000  | 50.73 | 49.26 |
| 9  | Coronal  | 498 | 24 | 11952 | 52.98 | 51.03 |

|    |         |     |    |       |       |       |
|----|---------|-----|----|-------|-------|-------|
| 10 | Axial   | 546 | 30 | 16380 | 55.15 | 52.89 |
| 11 | Axial   | 594 | 33 | 19602 | 57.25 | 55.20 |
| 12 | Coronal | 642 | 35 | 22470 | 53.21 | 51.56 |
| 13 | Axial   | 594 | 35 | 20790 | 55.69 | 52.52 |
| 14 | Axial   | 642 | 35 | 22470 | 57.10 | 53.86 |

Patient 11

|    |          |     |    |       |       |       |
|----|----------|-----|----|-------|-------|-------|
| 1* | Axial    | 150 | 10 | 1500  | 46.22 | 43.50 |
| 2* | Axial    | 150 | 10 | 1500  | 44.93 | 42.90 |
| 3  | Sagittal | 180 | 10 | 1800  | 45.97 | 44.75 |
| 4  | Sagittal | 180 | 10 | 1800  | 43.09 | 43.76 |
| 5  | Axial    | 250 | 10 | 2500  | 48.26 | 46.87 |
| 6  | Axial    | 250 | 10 | 2500  | 47.20 | 45.55 |
| 7  | Axial    | 300 | 10 | 3000  | 49.43 | 46.52 |
| 8  | Coronal  | 300 | 10 | 3000  | 47.30 | 46.20 |
| 9  | Axial    | 500 | 10 | 5000  | 54.29 | 50.79 |
| 10 | Axial    | 600 | 10 | 6000  | 55.91 | 52.10 |
| 11 | Coronal  | 600 | 13 | 7800  | 55.34 | 53.54 |
| 12 | Axial    | 600 | 17 | 10200 | 59.65 | 55.66 |
| 13 | Axial    | 600 | 20 | 12000 | 58.40 | 55.96 |

Patient 12

|    |          |     |    |       |       |       |
|----|----------|-----|----|-------|-------|-------|
| 1  | Axial    | 200 | 10 | 2000  | 43.43 | 41.62 |
| 2  | Axial    | 250 | 10 | 2500  | 45.34 | 43.85 |
| 3  | Coronal  | 250 | 10 | 2500  | 44.01 | 43.30 |
| 4  | Axial    | 400 | 10 | 4000  | 47.33 | 46.02 |
| 5  | Axial    | 452 | 10 | 4520  | 49.66 | 46.80 |
| 6  | Sagittal | 504 | 10 | 5040  | 46.39 | 45.21 |
| 7  | Axial    | 599 | 13 | 7793  | 53.81 | 51.17 |
| 8  | Axial    | 649 | 13 | 8437  | 54.88 | 52.58 |
| 9* | Coronal  | 698 | 13 | 9080  | 51.63 | 49.92 |
| 10 | Axial    | 702 | 20 | 14040 | 60.19 | 54.53 |
| 11 | Axial    | 754 | 20 | 15080 | 57.16 | 53.59 |
| 12 | Axial    | 754 | 27 | 20358 | 55.32 | 53.94 |
| 13 | Axial    | 806 | 31 | 24986 | 61.60 | 57.26 |

Patient 13

|    |          |     |    |       |       |       |
|----|----------|-----|----|-------|-------|-------|
| 1  | Axial    | 200 | 10 | 2000  | 47.34 | 45.59 |
| 2  | Axial    | 200 | 10 | 2000  | 46.41 | 44.03 |
| 3  | Coronal  | 200 | 10 | 2000  | 48.18 | 45.41 |
| 4  | Axial    | 300 | 10 | 3000  | 52.24 | 48.54 |
| 5* | Axial    | 300 | 10 | 3000  | 49.67 | 45.23 |
| 6* | Sagittal | 300 | 10 | 3000  | 49.10 | 46.99 |
| 7  | Axial    | 450 | 10 | 4500  | 56.02 | 51.82 |
| 8  | Axial    | 450 | 17 | 7650  | 58.76 | 56.17 |
| 9  | Axial    | 450 | 24 | 10800 | 63.14 | 57.22 |
| 10 | Axial    | 499 | 27 | 13486 | 65.14 | 60.58 |

Patient 14

|     |          |     |    |       |       |       |
|-----|----------|-----|----|-------|-------|-------|
| 1   | Axial    | 150 | 10 | 1500  | 42.95 | 41.53 |
| 2   | Axial    | 199 | 10 | 1995  | 46.35 | 43.87 |
| 3   | Coronal  | 199 | 10 | 1995  | 46.20 | 44.95 |
| 4*  | Axial    | 300 | 10 | 3000  | 47.92 | 46.26 |
| 5   | Axial    | 351 | 10 | 3510  | 51.02 | 48.54 |
| 6   | Sagittal | 402 | 10 | 4020  | 52.26 | 48.58 |
| 7   | Sagittal | 402 | 10 | 4020  | 52.71 | 49.66 |
| 8   | Axial    | 500 | 10 | 5000  | 52.59 | 49.00 |
| 9   | Axial    | 550 | 13 | 7150  | 57.33 | 53.37 |
| 10* | Axial    | 552 | 20 | 11040 | 57.99 | 54.96 |
| 11  | Axial    | 552 | 20 | 11040 | 54.02 | 52.28 |

Patient 15

|    |          |     |    |       |       |       |
|----|----------|-----|----|-------|-------|-------|
| 1  | Axial    | 200 | 10 | 2000  | 43.99 | 42.40 |
| 2* | Axial    | 250 | 10 | 2500  | 44.68 | 42.22 |
| 3  | Coronal  | 250 | 10 | 2500  | 43.20 | 42.41 |
| 4  | Coronal  | 300 | 13 | 3900  | 43.91 | 43.11 |
| 5  | Axial    | 450 | 13 | 5850  | 49.03 | 46.82 |
| 6  | Axial    | 450 | 13 | 5850  | 49.01 | 45.30 |
| 7  | Sagittal | 450 | 13 | 5850  | 45.54 | 45.31 |
| 8  | Axial    | 700 | 13 | 9100  | 55.07 | 51.03 |
| 9  | Axial    | 700 | 17 | 11900 | 53.25 | 50.21 |
| 10 | Coronal  | 749 | 17 | 12733 | 51.60 | 50.61 |
| 11 | Coronal  | 896 | 17 | 15232 | 52.77 | 50.55 |
| 12 | Axial    | 904 | 20 | 18080 | 52.68 | 51.02 |
| 13 | Axial    | 904 | 31 | 28024 | 61.14 | 54.45 |
| 14 | Axial    | 904 | 31 | 28024 | 54.05 | 52.78 |
| 15 | Axial    | 904 | 35 | 31640 | 56.26 | 53.27 |
| 16 | Axial    | 904 | 39 | 35256 | 57.30 | 53.89 |

Patient 16

|    |          |     |    |       |       |       |
|----|----------|-----|----|-------|-------|-------|
| 1  | Axial    | 200 | 10 | 2000  | 44.25 | 41.05 |
| 2  | Axial    | 300 | 10 | 3000  | 43.67 | 41.79 |
| 3  | Axial    | 350 | 10 | 3500  | 43.13 | 43.30 |
| 4  | Axial    | 450 | 10 | 4500  | 45.81 | 46.28 |
| 5  | Axial    | 450 | 10 | 4500  | 45.23 | 45.37 |
| 6  | Coronal  | 450 | 10 | 4500  | 50.50 | 46.99 |
| 7  | Coronal  | 450 | 10 | 4500  | 47.28 | 44.75 |
| 8  | Axial    | 550 | 10 | 5500  | 53.15 | 49.56 |
| 9  | Axial    | 550 | 10 | 5500  | 47.32 | 47.30 |
| 10 | Sagittal | 550 | 10 | 5500  | 47.66 | 46.78 |
| 11 | Axial    | 550 | 17 | 9350  | 53.06 | 49.87 |
| 12 | Axial    | 649 | 20 | 12980 | 53.51 | 51.51 |
| 13 | Axial    | 699 | 27 | 18860 | 52.85 | 51.90 |
| 14 | Axial    | 649 | 39 | 25311 | 54.01 | 52.73 |
| 15 | Axial    | 649 | 43 | 27907 | 53.64 | 53.53 |
| 16 | Axial    | 649 | 43 | 27907 | 57.11 | 55.85 |

|    |       |     |    |       |       |       |
|----|-------|-----|----|-------|-------|-------|
| 17 | Axial | 649 | 43 | 27907 | 54.87 | 52.99 |
|----|-------|-----|----|-------|-------|-------|

Patient 17

|     |          |     |    |       |       |       |
|-----|----------|-----|----|-------|-------|-------|
| 1   | Axial    | 150 | 10 | 1500  | 41.65 | 40.15 |
| 2   | Axial    | 200 | 10 | 1995  | 39.65 | 40.47 |
| 3   | Axial    | 299 | 10 | 2985  | 45.62 | 42.69 |
| 4   | Axial    | 348 | 10 | 3480  | 42.99 | 41.81 |
| 5   | Axial    | 348 | 10 | 3480  | 44.38 | 43.34 |
| 6*  | Axial    | 348 | 10 | 3480  | 38.54 | 38.41 |
| 7   | Coronal  | 398 | 10 | 3975  | 45.08 | 44.41 |
| 8   | Axial    | 600 | 10 | 6000  | 50.33 | 47.67 |
| 9   | Axial    | 600 | 10 | 6000  | 47.38 | 46.13 |
| 10* | Sagittal | 648 | 10 | 6480  | 45.64 | 47.23 |
| 11  | Axial    | 650 | 17 | 11050 | 50.92 | 50.37 |
| 12  | Axial    | 702 | 20 | 14040 | 52.73 | 50.37 |
| 13  | Axial    | 754 | 30 | 22620 | 57.84 | 54.81 |
| 14  | Axial    | 754 | 39 | 29406 | 56.71 | 53.69 |
| 15  | Axial    | 754 | 39 | 29406 | 55.19 | 52.21 |
| 16  | Axial    | 754 | 43 | 32422 | 53.99 | 53.04 |
| 17  | Axial    | 754 | 43 | 32422 | 56.74 | 53.33 |

Patient 18

|    |          |     |    |       |       |       |
|----|----------|-----|----|-------|-------|-------|
| 1  | Axial    | 200 | 10 | 2000  | 43.54 | 42.50 |
| 2  | Axial    | 200 | 10 | 2000  | 46.65 | 44.21 |
| 3* | Coronal  | 200 | 10 | 2000  | 42.49 | 41.70 |
| 4  | Axial    | 400 | 10 | 4000  | 52.21 | 47.68 |
| 5  | Axial    | 400 | 10 | 4000  | 50.27 | 47.16 |
| 6  | Sagittal | 400 | 10 | 4000  | 47.82 | 45.89 |
| 7  | Axial    | 450 | 17 | 7650  | 55.13 | 51.92 |
| 8  | Axial    | 499 | 24 | 11988 | 56.46 | 53.97 |
| 9  | Axial    | 499 | 31 | 15484 | 56.40 | 54.18 |
| 10 | Axial    | 552 | 35 | 19337 | 53.12 | 51.17 |

Patient 19

|     |          |     |    |       |       |       |
|-----|----------|-----|----|-------|-------|-------|
| 1*  | Axial    | 200 | 10 | 2000  | 44.76 | 43.81 |
| 2*  | Axial    | 200 | 10 | 2000  | 43.13 | 42.90 |
| 3   | Coronal  | 250 | 10 | 2500  | 44.87 | 43.07 |
| 4   | Axial    | 400 | 10 | 4000  | 50.80 | 46.79 |
| 5   | Axial    | 400 | 10 | 4000  | 48.93 | 45.27 |
| 6*  | Sagittal | 400 | 10 | 4000  | 44.47 | 43.98 |
| 7   | Axial    | 500 | 13 | 6500  | 53.27 | 49.86 |
| 8*  | Axial    | 500 | 17 | 8500  | 49.64 | 46.08 |
| 9   | Axial    | 500 | 17 | 8500  | 52.78 | 49.73 |
| 10* | Axial    | 600 | 20 | 12000 | 53.91 | 50.11 |
| 11* | Axial    | 600 | 20 | 12000 | 50.66 | 49.10 |
| 12  | Axial    | 550 | 24 | 13200 | 55.77 | 53.63 |
| 13  | Axial    | 550 | 30 | 16500 | 54.66 | 52.49 |
| 14  | Axial    | 550 | 39 | 21450 | 58.43 | 55.91 |

|    |       |     |    |       |       |       |
|----|-------|-----|----|-------|-------|-------|
| 15 | Axial | 603 | 39 | 23517 | 55.22 | 52.82 |
| 16 | Axial | 580 | 43 | 24940 | 56.69 | 52.95 |
